# Supplementary material for: Knickpoints and Fixpoints: The Evolution of Fluvial Morphology under the Combined Effect of Fault Uplift and Dam Obstruction on a Soft Bedrock River
Source: Copernicus journal article supplement (doi:10.5194/esurf-2023-8), 2023-03-30
Supplement: Supplementary file [file esurf-2023-8-AC2-supplement.pdf]

## Reviewer 2

Chen et al. discuss the effects of co-seismic fault displacements and a dam on the evolution of longitudinal and cross-sectional forms of three bedrock rivers in Taiwan. The multi-temporal topographic data, used in this study are unique and valuable to understand the evolution of the bedrock rivers. The content of this study matches the scope of Earth Surface Dynamics; however, I believe there are some major issues to be addressed before publication. I provide the key comments below and the minor comments in the attached PDF.

We would like to express our sincere gratitude to the reviewer for the positive feedback and acknowledgment. We greatly appreciate the minor comments provided by the reviewer, as they have been incredibly helpful in bridging any language gaps between our work and the readers. The open discussions resulting from these comments will undoubtedly enhance the clarity of the research content for interested readers. We have carefully addressed each comment and provided thorough responses.

Key comments:

- 1) Further descriptions and discussions on the combined effects of fault displacement and dam obstruction are required. Because the co-seismic knickpoint in the Dajia River disappeared due to river training in 2008, the upstream newer knickpoint and the evolution of the river following the migration of the newer knickpoint are not necessarily related to the fault activity. However, the current discussion implicitly assumes the newer knickpoint is related to fault activity. I think further explanations on how the river training in 2008 changed the channel morphology and the origin of the newer knickpoint. In addition, you have to explain Figure 13 in more detail. Although it must be the most important outcome of this study and you clearly state proposing the evolution model is the aim of this study, I do not see any descriptions on this figure.

If there were no earthquakes and the impact was solely due to the dam, the riverbed in this area would have experienced deepening similar to the result observed in the Zhuoshui River, without the occurrence of new knickpoints. Therefore, despite the presence of other factors (such as geological factors), the appearance of the new knickpoint (in 2005) is still attributed to the earthquake.

In addition, we appreciate the suggestion for Fig. 13. We have modified the content in Lines 323–327 that depicts Fig. 13.

- 2) It is not clear how you evaluated results of the 2-D river profile evolution. Although I am not familiar with the mathematical model in this study, the modeled river profiles do not seem to be consistent with actual river profiles. In the Daan river (fig 5), while the model predicts the river profile downstream of the knickpoint keeps its original shape during knickpoint retreat, the actual river profile changes its shape during knickpoint retreat (the knickzone stretches horizontally, and there is much less incision downstream of the knickpoint). In the Dajia River (fig 11), while the model predicts the channel slope upstream of the knickpoint is essentially the same except at the dam, the actual channel steepening occurred more extensively between the knickpoint and the dam.

We appreciate the reviewer for carefully comparing the numerical model results with the actual riverbed changes. However, it is essential to recognize that the numerical model is conceptual and involves several assumptions, such as not considering variations in the horizontal 2D plane of the terrain and assuming homogeneous parameters within the simulation area, among others. In addition, in the case of the Dajia River, due to the lacking of early cross-sectional survey data downstream of the dam, the presented cross-sections f, g, and h in this study did not reflect the steep slope in front of the dam. Also, there are also many engineering interventions here (in front of the dam) to prevent ongoing scouring. Even mobile-bed models used to simulate river sediment transport during flooding cannot accurately replicate riverbed changes. The numerical model cannot fully capture the actual scenario's detailed morphology and environmental conditions; it serves as a conceptual model based on physical mechanisms, providing trends rather than precise representations. We still use coefficient comparisons at the reach scale to demonstrate the discrepancies between the numerical model and the observed changes. Furthermore, it should be noted that the simulation results for the case under the combined effect of fault uplift and dam have not been presented or discussed in previous studies.

- 3) Since the observations in the Daan river are similar to those presented in Cook et al. (2013) and Cook et al. (2014), you may want to clarify the difference between this study and previous studies or add newer implications. Although the data in 2017 is not included in Cook et al. (2014),

it seems the current explanations on the Daan river are essentially the same as those in Cook et al. (2014).

This is also the reason why we placed the case of the Daan River as the first example. Our research is not intended to directly compare with Cook et al. (2014); instead, we want to build upon previous studies' findings and discuss various scenarios. We believe that this approach holds more academic significance on morphology.

As you correctly captured in the key comment #1, the Dajia River case is our paper's main focus. Therefore, we compared it with the Daan River and Zhuoshui River cases to highlight its importance and provide a comprehensive analysis. We believe this will be more valuable.

Minor comments:

1. Line 45: What does "river pattern" mean?

In this context, the term "river pattern" refers to the plan view of a river reach observed from an aerial perspective. We will cite Leopold and Wolman (1957), who also used "river channel pattern" to discuss the same issue.

2. Line 72-73: "abrupt slope" means "abrupt change in slope"?

Our intention was to convey the change from a gentle slope to a steep one. In order to prevent confusion among readers, we have made the necessary revisions to the relevant text. We sincerely appreciate your valuable feedback, as it helps us improve the quality of our work.

The sentence has been revised as "As the base level of erosion fell, the stream encountered an abrupt shift in slope from gentle to steep, which significantly accelerated the flow, and subsequently led to erosion of the stream bed." (Lines72–74)

3. Line 84: Please clarify "Historical data".

Incl. multiyear satellite images, orthographic images, cross-sectional and longitudinal profiles. (Lines 84–85)

4. Line 95: Please indicate the location of "the middle and upper reaches".

Regarding the reviewer's comment on the unclear definition, we have made revisions by modifying this to approximate the average slope of the entire river (Line 96).

5. Line 102: Huang et al. (2014)?

We have corrected this error in the revised version. (Line103).

6. Line 104: Please clarify "Uneven uplift".

The coseismic movement resulted in vertical displacement of up to 8–10 meters at the northwestern corner of the rupture zone, where our study area is located. The distribution of uplift values is shown in Fig. 2, and further details are explained in Lines 107, 111–114. Lee et al. (2002) provide a more comprehensive description of the geometry and structure of the earthquake's surface ruptures.

7. Line 108: Please indicate when the Shigang dam was constructed.

The Shigang dam construction was finished in 1977. After the earthquake, the dam reconstruction was completed in 2000. We have added some explanations in Lines 105–110.

8. Line 119: Please provide the resolutions and dates of the satellite images.

The resolution of the satellite images and the orthographic images are 2m, and 25cm–50cm, respectively. We have added these in Lines 121–123.

Dates for images of Zhuoshui River :19981111, 20031114, 20070629, 20180116

Dates for images of Dajia River: 20000801, 20051103, 20080822, 20171214

Dates for images of Daan River:20001112, 20040712, 20071025, 20110429, 20171214

9. Line 122: Please explain more about the survey by WRA, such as survey dates, observation spacings, instruments...etc.

Survey is conducted using Total Station, GPS, and depth sounder. There is a survey point every 5–10 meters, and the elevation error must not exceed five centimeters. (lines125–126)

10.Line 137: Does this equation assume sediment supply from upstream is negligible or there is no deposition?

A more accurate assumption is that  $q_s$  can be regarded as the net sediment transport rate at this location, representing the difference between output and input sediment volumes within the control volume. This formula was proposed by Bressan et al. (2014).

11.Line 145: You may want to clarify what “localized phenomena” are.

The factor  $M$  represents the increase in shear stress. The term  $A \frac{(z-z_0)}{H_0}$  means the change in shear stress due to the flow expansion downstream of the knickpoint. The term  $B \frac{\partial z}{\partial x}$  represents the change in shear stress attributed to the local slope.

Because the advective and diffusive knickpoint migration model has already been explained in Bressan et al. (2014), we prefer not to describe the parameters and the corresponding localized phenomena. Specifically, when calculating the model (equation 2a), including the values of  $M$ ,  $A$ , and  $B$  is unnecessary.

12.Line 160-167: This paragraph may be better placed in the Study area section because you simply summarize previous studies rather than presenting your results.

We have carefully considered this opinion, but placing this paragraph in the study area section appears to provide an overly detailed introduction. However, we believe that even though it is not part of our research findings, it could serve as an opening statement for the migration results of the Daan River.

13.Line 172: Please indicate parameter values used in this study. The same applies to the modeling results for the Dajia River.

The parameters  $C$  and  $D$  values are provided in Lines 182-183 and 284. With these given values, it is possible to reproduce the numerical model results. Additionally, the values of parameter  $C$ , which denote the migration rate, are also listed in Table 1 and can be compared to the knickpoint retreat rate.

14.Line 176: I think you should clarify what  $C$  and  $D$  represent in an actual landscape. For instance, does  $C$  correspond with the knickpoint travel speed? If so, I suggest you calculate knickpoint travel speed using the satellite images. Since the knickpoint location and the dates the images were taken are known, you can calculate the actual knickpoint travel speed and compare them with the speed predicted by the model.

From numerical perspective,  $C$  and  $D$  are the advection and diffusion coefficients, respectively.  $C$  and  $D$  contain hydraulic and sedimentological properties. Both parameters are directly related to the channel slope and erodibility, which are crucial factors controlling the retreat of knickpoints.

We are pleased that our viewpoint aligns with the reviewer. The values of  $C$  are also documented in Table 1. Furthermore, we have analyzed the knickpoint retreat rate, which is also presented in Table 1. These two values are quite similar, and slight variations can be attributed to differences in data sources and calculation methods.

15. Line 216: Is “erosion font” correct?

It should be erosion front. Thank you for the correction.

16.Line 221: Consider removing “topographic.

We agree with the suggestion.

17.Line 238: What is “effect zone”?

It refers to the area under "tool effect." We have adjusted the sentence order for better understanding.

18.Line 240: Please clarify “channelization”

Channelization means the restriction of natural waterway due to external factors, limiting the flow section for water passage.

The same meaning can be found in these references: Williams & Wolman(1984), Huang et al. (2014), and Liro et al. (2017).

19.Line 247: Please explain where groundsills were added.

The reach between the sections **d** and **e**.

We have revised the sentence so the readers can know where the engineering measures were added.

“Between section **d** and **e**, groundsills, spur dikes, and tetrapod were added to the river channel to prevent erosion, and the riverbed level rose slightly at section **e**.”

20.Line 249: Please clarify “stratified erosion”

We have modified the sentence as follows:

“Progressive erosion layer by layer is apparent in the chronological longitudinal profiles (Fig. 8).” (Lines 253–254)

21.Line 255-258: This paragraph is essentially the same as in lines 235-241.

We have removed the repeated parts.

22.Line 263: “The base level of erosion declined downstream after uplift causing the knickpoint to move headward.” I could not understand this sentence. Please reconsider the sentence.

The sentence has been modified to “The earliest knickpoint formed close to section **f** and moving headward with time.” (Line 262-263)

23.Line 264: Is “400m” correct? I see 40m in fig9.

It should be 40m. Thank you for the correction.

24.Line 268-269: Does “the flow path between section g and the dam became a floodplain” mean the gorgelike channel was completely filled? Based on the satellite image, it is not clear how the artificial activity changed the channel.

Our original intention is not to attribute the river channel changes solely to engineering influence. We will make modifications to avoid any misunderstandings.

In the cross-sectional view, it can be observed that before 2005, the thalweg in this section of the river was not well-determined, showing braided channels (characterized by exposed rock layers). The gorge-like morphology was not formed yet. (Lines 267–268)

25.Line 277-278: Although you argue “The channel starting from the toe...until 2017”, the channel shown in figure 9 is continuous between the dam and the fault (section f). Please rewrite the sentence or modify the figure.

The description here is about the existence of a knickpoint, causing a discontinuity in the riverbed slope. We will modify the sentence as follows:  
“In 2008, it can be observed that the knickpoint existed in the reach between sections **g** and **h**; therefore the slope of the channel is still discontinuous.” (Lines 276–277)

26.Line 288-289: Although the current gap between the modeled and actual evolution of river profiles may be considered minor, as a person who are unfamiliar with the current model prediction, I feel there is a substantial difference between the model output and your observation. Please consider explaining how you evaluated the model.

The numerical model cannot reflect the detail of the actual morphology and the environmental conditions; instead, it is a conceptual model based on physical mechanisms, capable of presenting trends only. At the reach scale, we still use coefficient comparisons to illustrate the differences between the numerical model and actual changes.

27.Line 293: Which timeframe does “After the Chi-Chi earthquake” mean?

To be specific, it represents the time after the earthquake to the year 2021.

28.Line 295 “the thalweg...”: Are you referring to WD ratio?

Thank you for the correction. The aspect ratio ( $W/D$ ) is corrected.

29.Line 304, What does “the slope replacement resulted in a natural profile” mean?

This refers to the gradual recovery of the river slope to continuous. We have cited Fig 1a in this paragraph and modified the sentences related to the longitudinal profile changes in the Daan River: "During the change in river pattern, the longitudinal profile variation occurs simultaneously, similar to the one shown in Fig 1a."

30.Line 312: Is “non-equilibrium state” related to topographic steady state where rates of erosion and uplift match? How did you judge if the river reached equilibrium or not?

Referring to the concept of sediment transport, equilibrium means



when the input and output of sediment in the control volume of a river reach a close balance.

In the case of the Zhuoshui River, it can be observed that the profiles downstream of the dam continue to erode deeper, indicating a non-equilibrium state (Fig1b).

31.Line 318-319: What does “the restoration of the Daan river” mean?

We have made a change to "the start of recovery to a braided river cannot happen in Dajia River." (Lines 317–318)

32.Line 322: Please clarify what you meant by “topographic development... (Davis, 1899).” Presenting an abstract concept alone does not help readers to understand your argument.

We accept the reviewer's suggestion and will remove this sentence to avoid confusion for the readers.

33.Line 334: What is “potential for recovery”?

As in comment 30, we will make the change to: "...the river showed potential for recovery to a braided river pattern." (Line 334)

#### Reference:

- Davis, W. M.: Rivers and valleys of Pennsylvania, Geographical essays by William Morris Davis, 413-513, 1889.
- Huang, M. W., Liao, J. J., Pan, Y. W., and Cheng, M. H.: Rapid channelization and incision into soft bedrock induced by human activity - Implications from the Bachang River in Taiwan, *Engineering Geology*, 177, 10-24, <https://doi.org/10.1016/j.enggeo.2014.05.002>, 2014.
- Lee, J. C., Chu, H. T., Angelier, J., Chan, Y. C., Hu, J. C., Lu, C. Y., and Rau, R. J.: Geometry and structure of northern surface ruptures of the 1999 Mw = 7.6 Chi-Chi Taiwan earthquake: Influence from inherited fold belt structures, *Journal of Structural Geology*, 24, 173-192, [https://doi.org/10.1016/S0191-8141\(01\)00056-6](https://doi.org/10.1016/S0191-8141(01)00056-6), 2002.
- Liro, M.: Dam-induced base-level rise effects on the gravel-bed channel planform, *Catena*, 153, 143-156, <https://doi.org/10.1016/j.catena.2017.02.005>, 2017.
- Kuo, C.-W., Tfwala, S., Chen, S.-C., An, H.-P., and Chu, F.-Y.: Determining transition reaches between torrents and downstream rivers using a valley morphology index in a mountainous landscape, *Hydrological Processes*, 35, e14393, <https://doi.org/10.1002/hyp.14393>, 2021.
- Leopold, L. B. and Wolman, M. G.: *River channel patterns: braided, meandering, and straight*, US Government Printing Office, 1957.
- Williams, G. P., and Wolman, M. G.: *Downstream effects of dams on alluvial rivers* 1286, 1984.
